# Supplementary material
Source: Research Square preprint supplement (doi:10.21203/rs.3.rs-8567933/v1)

**Group:** C Control  
M Model  
i Ethanol+i-PRF  
N Ethanol+NS

**LIF**  
1、

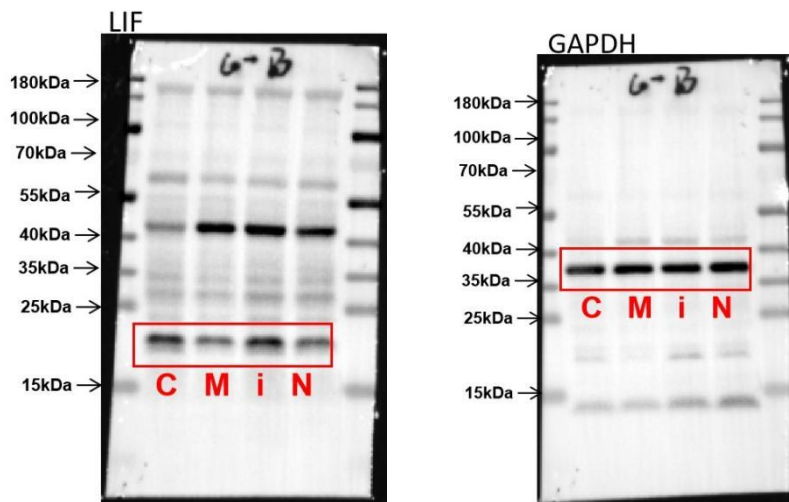

2+3、

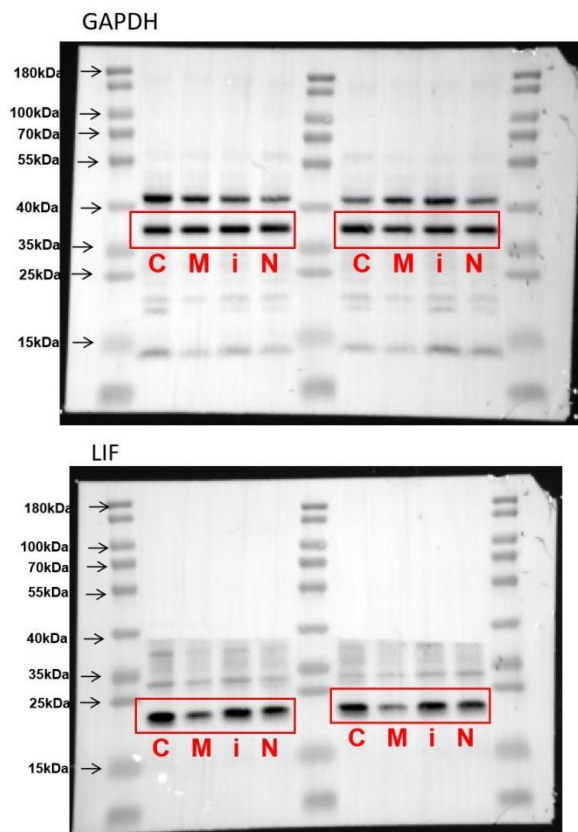

# Vimentin

1、

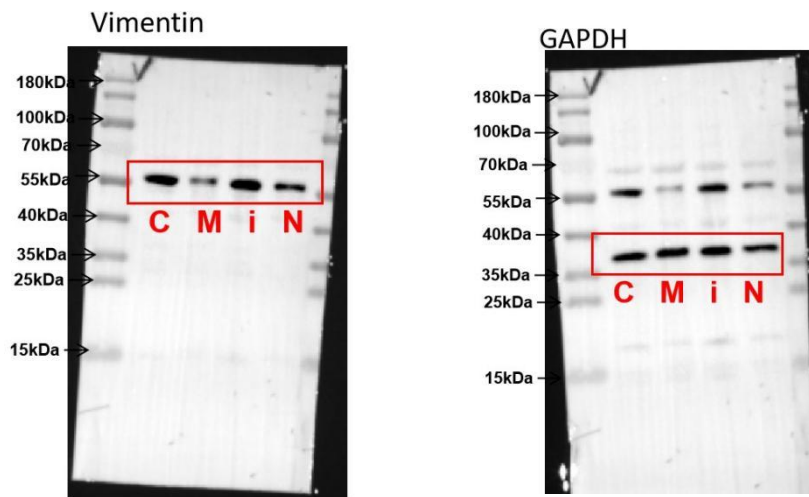

2、

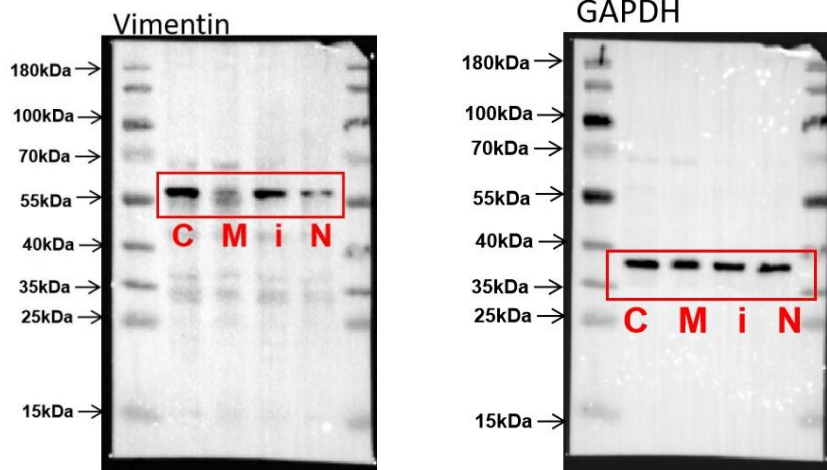

3、

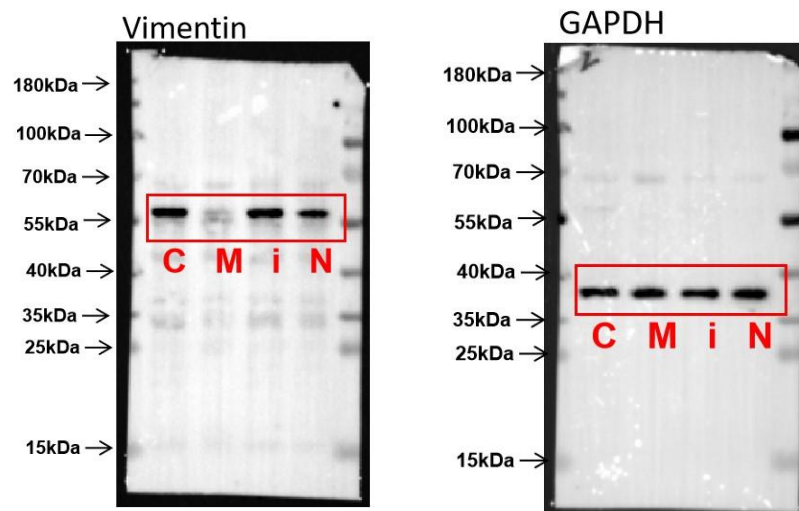

# VEGF

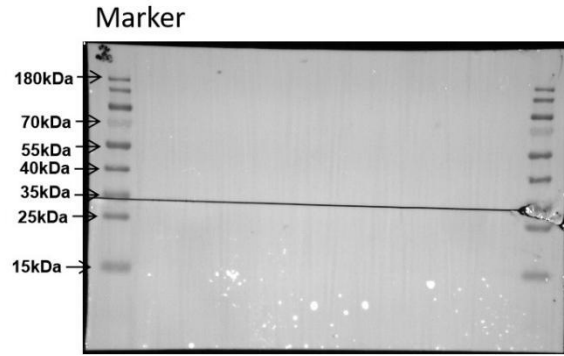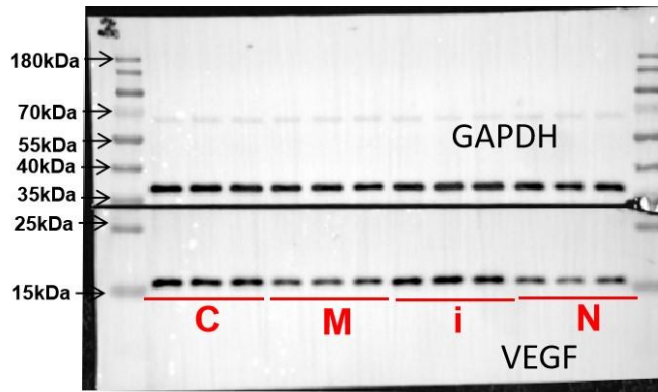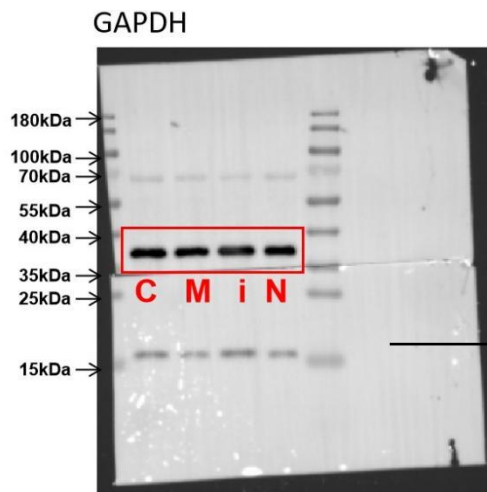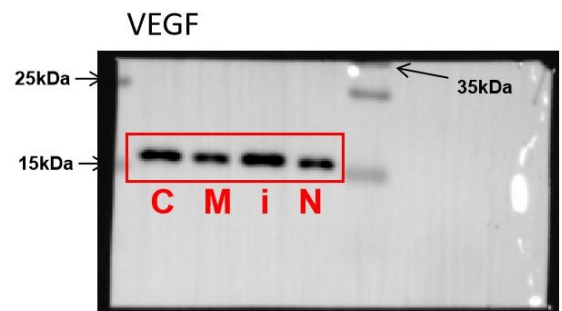

# Bax/Bcl-2

1、

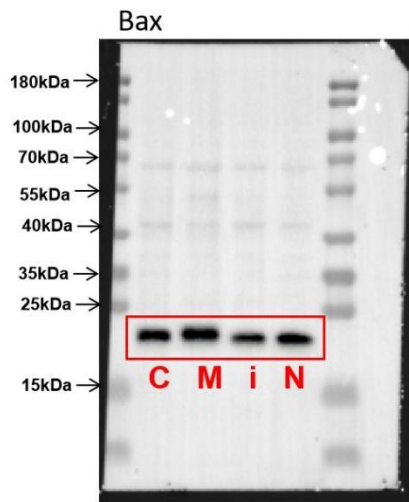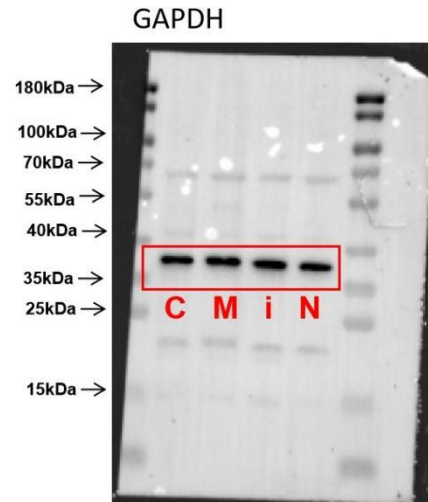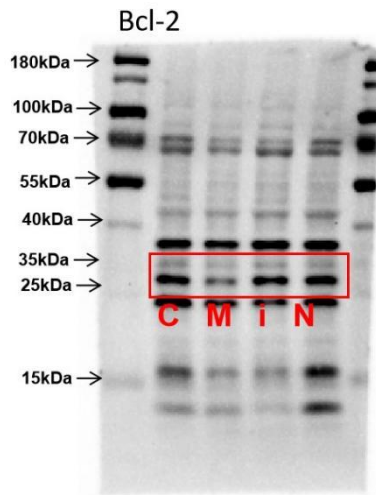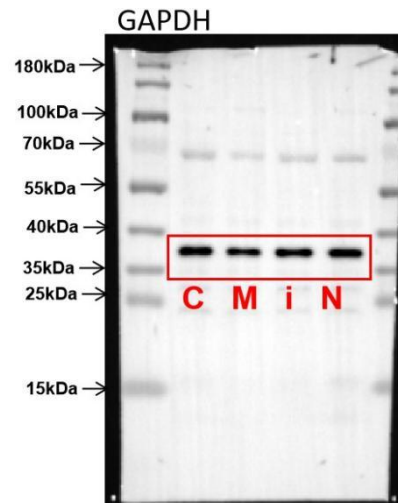

2、

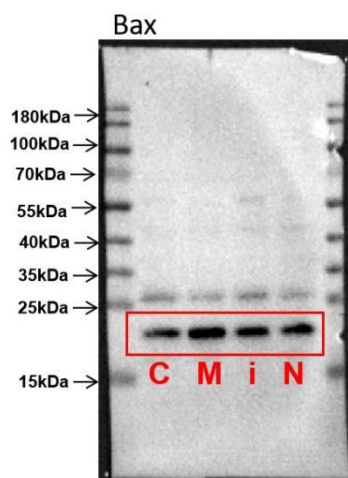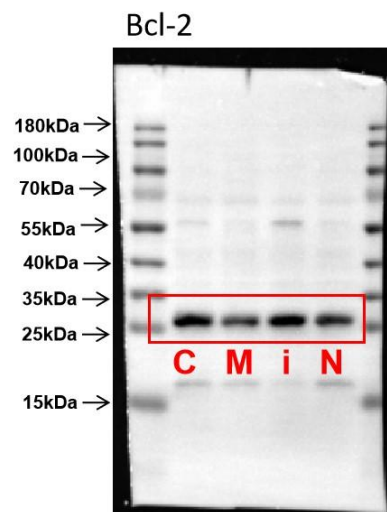

3、

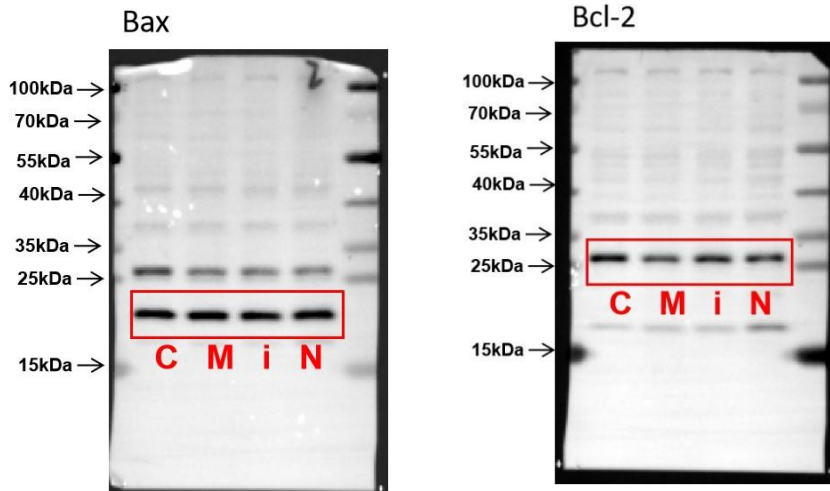

4、

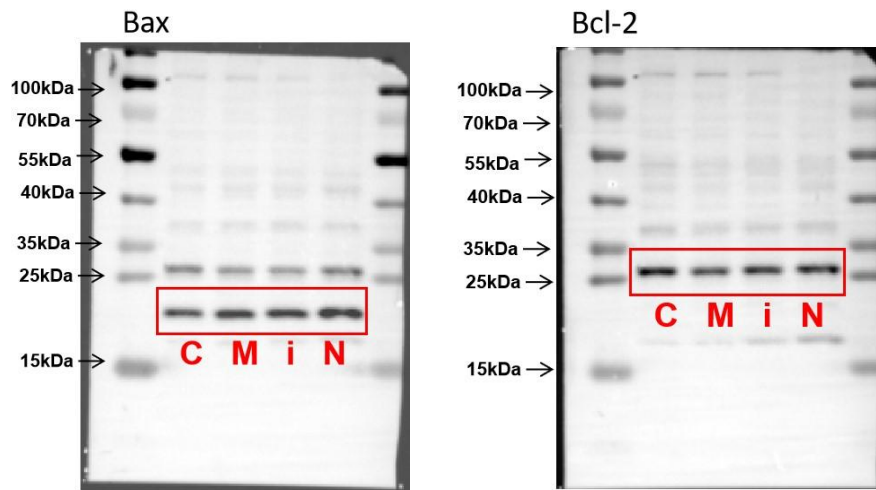

**Group:** C-Control  
P-Plt  
I-Plt+Int

**Vimentin**

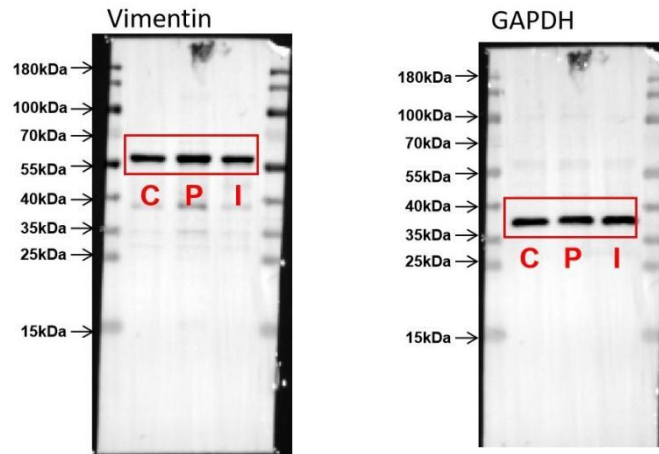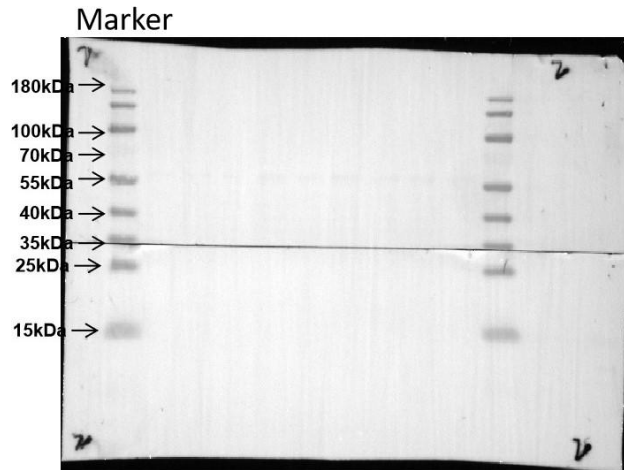

**Vimentin**

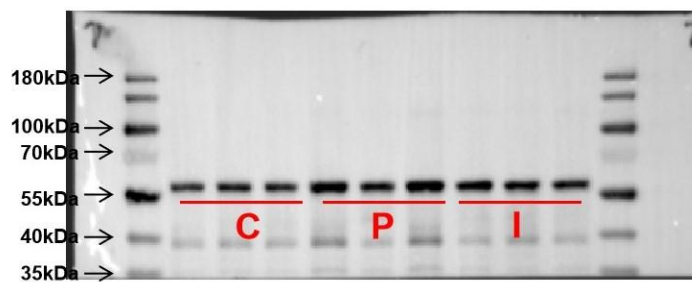

**GAPDH**

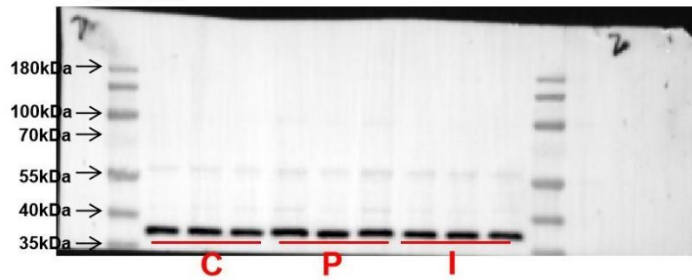

VEGF

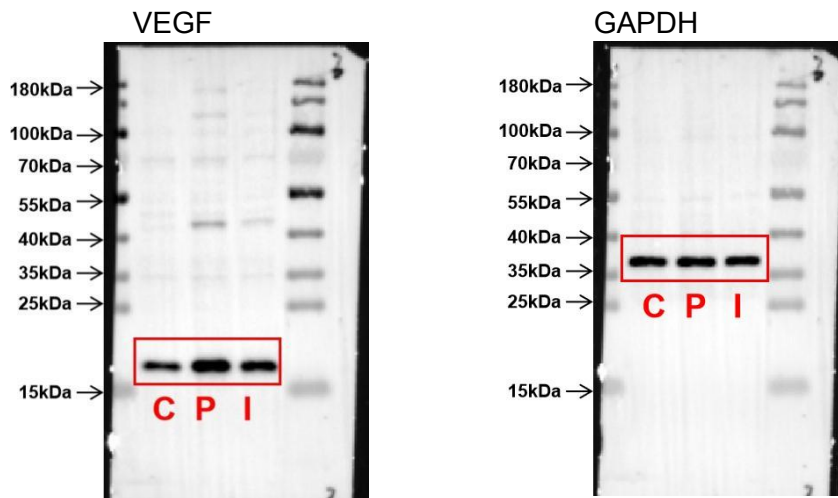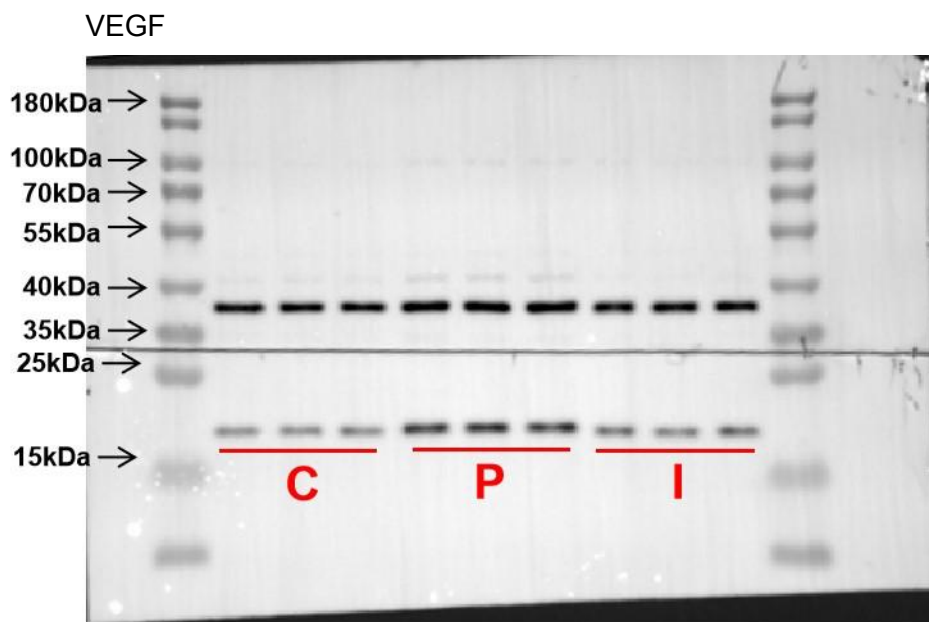

## Bax/Bcl-2

1、

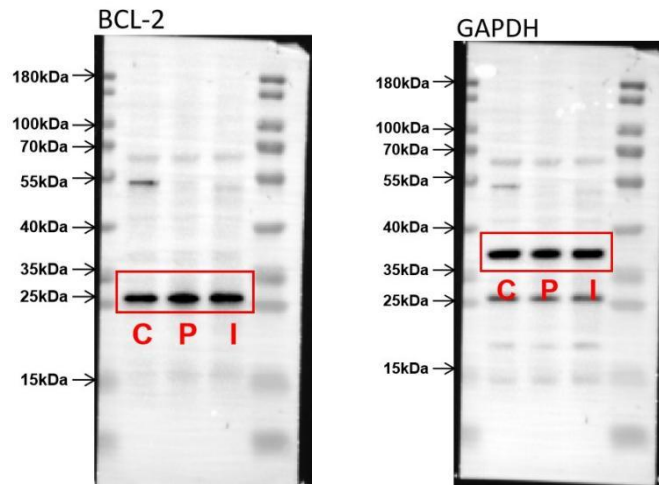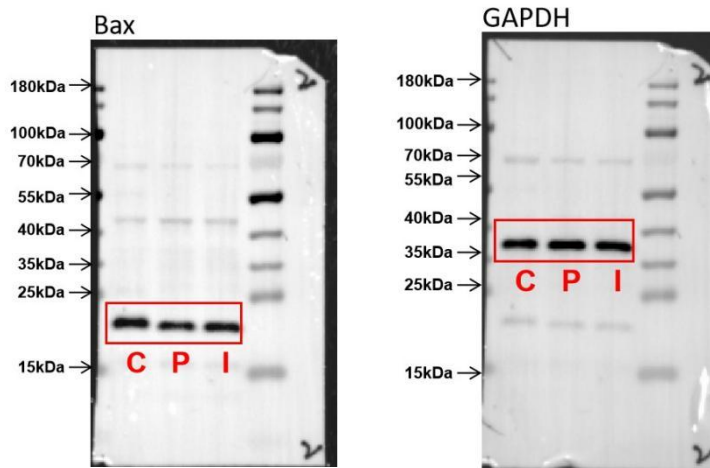

2、

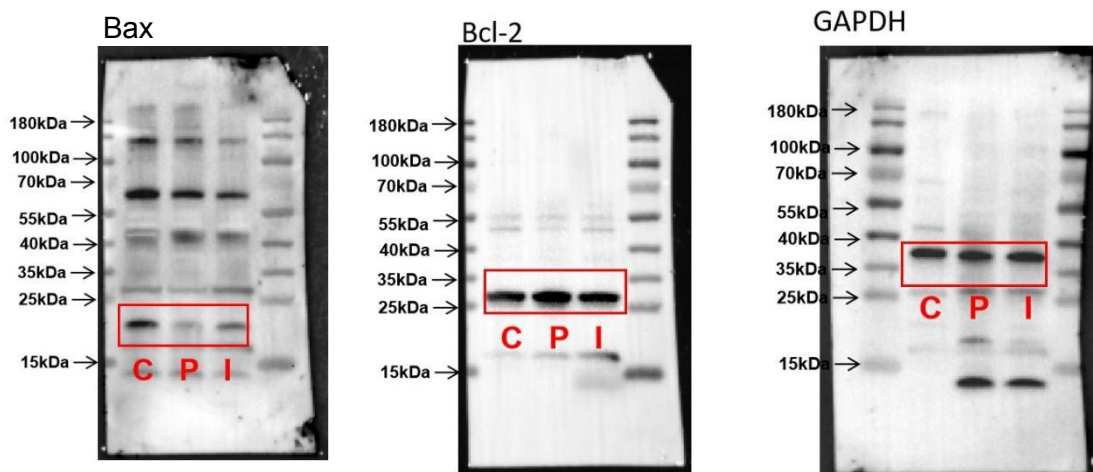

3、

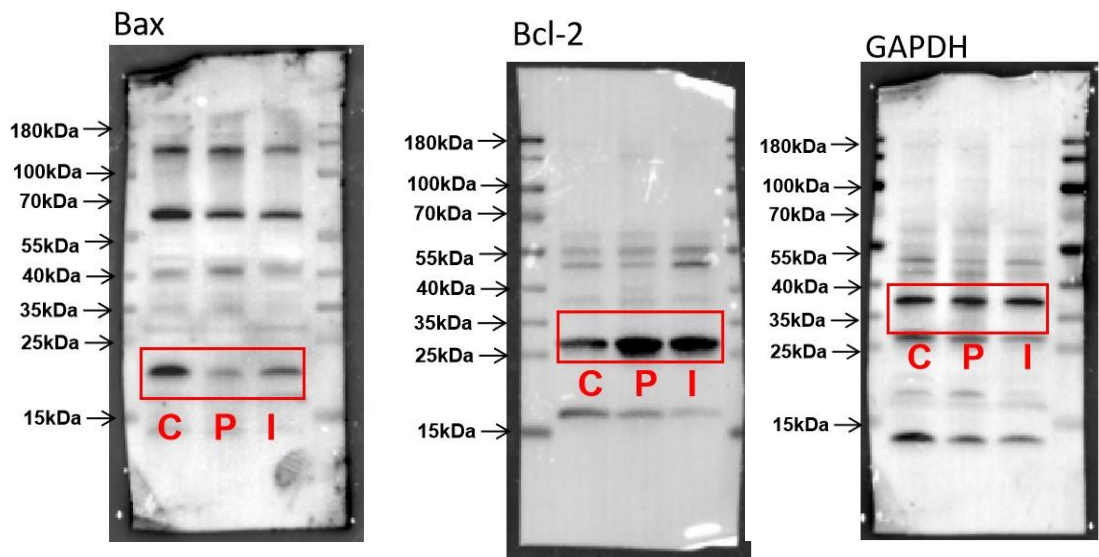

4、

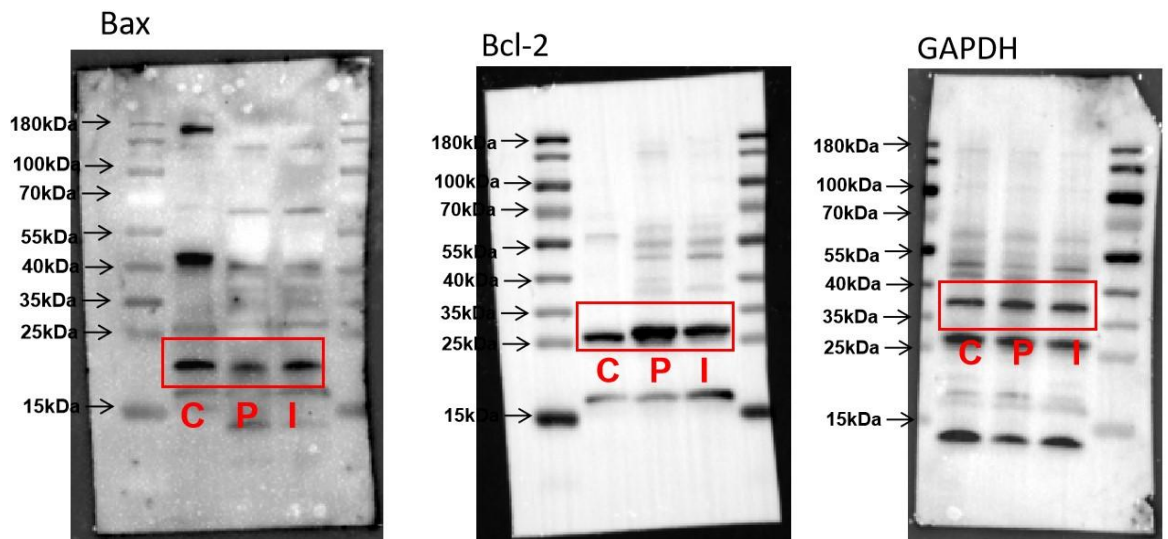

Supplement: Supplementary file 1 [file 2216bf7cf31711d7871c3be6.pdf]
