# Supplementary material
Source: Research Square preprint supplement (doi:10.21203/rs.3.rs-8567933/v1)

# 新疆医科大学实验动物伦理委员会审批报告

|          |                                                                                                                                                                                                                                                                                                                                                                   |        |                     |              |        |
|----------|-------------------------------------------------------------------------------------------------------------------------------------------------------------------------------------------------------------------------------------------------------------------------------------------------------------------------------------------------------------------|--------|---------------------|--------------|--------|
| 审查日期     | 2023年3月21日                                                                                                                                                                                                                                                                                                                                                        | 审查会议地点 | 新疆医科大学动物实验中心        |              |        |
| 项目名称     | i-PRF对薄型子宫内膜修复机制的研究                                                                                                                                                                                                                                                                                                                                               |        |                     |              |        |
| 项目来源     | 新疆维吾尔自治区自然科学基金面上项目                                                                                                                                                                                                                                                                                                                                                | 项目编号   | 2021D01C296         |              |        |
| 项目周期     | 2021年6月1日-2024年5月31日                                                                                                                                                                                                                                                                                                                                              | 动物实验周期 | 2023年5月1日-2024年4月1日 |              |        |
| 主要研究者姓名  | 田海清                                                                                                                                                                                                                                                                                                                                                               |        | 研究者单位               | 新疆医科大学第一附属医院 |        |
| 实验动物品种   | 大鼠                                                                                                                                                                                                                                                                                                                                                                | 实验动物品系 | SD                  | 实验动物数量       | 雌性：50只 |
|          |                                                                                                                                                                                                                                                                                                                                                                   |        |                     |              | 雄性：5只  |
| 伦理审批号    | IACUC-JT-20230321-71                                                                                                                                                                                                                                                                                                                                              | 审查状态   | 结题审查                |              |        |
| 实验内容     | <p>健康SD大鼠30只，随机分配至模型组与治疗组，每组15只。模型组：左侧宫角灌注95%乙醇，右侧宫角灌注生理盐水对照，构建薄型子宫内膜大鼠模型；治疗组：双侧宫角灌注95%乙醇构建薄型子宫内膜模型，14天后左侧宫角灌注i-PRF治疗，右侧宫角灌注生理盐水作为干预对照。实验操作全程使用异氟烷维持麻醉，保证大鼠正常呼吸。干预周期结束后在麻醉状态下经腹主动脉采血制备i-PRF与血小板，并收集大鼠子宫样本，经HE染色检测子宫结构变化；经免疫组织化学染色、qRT-PCR与Western blotting检测LIF、Vimentin、VEGF等研究相指标的变化；经免疫荧光技术检测Ki67等指标变化。纳入妊娠实验的雌性大鼠在干预周期结束后与雄鼠以1:1比例合笼并在妊娠15天时收集子宫样本，计算孕囊数。</p> |        |                     |              |        |
| 审查意见     | <p>经实验动物伦理委员会核查，该项目中的动物实验在符合实验动物福利伦理的原则下完成，<b>该伦审报告准予使用</b>。该项目中动物实验内容和过程遵循国际及国家颁布的有关伦理要求，符合实验动物福利伦理原则。</p> <p style="text-align: right;">新疆医科大学实验动物伦理委员会</p>                                                                                                                                                                                                     |        |                     |              |        |
| 伦理审查适用范围 | <p>该伦审报告用于项目结题、论文发表、专利申报、新药研发等方面。</p>                                                                                                                                                                                                                                                                                                                             |        |                     |              |        |

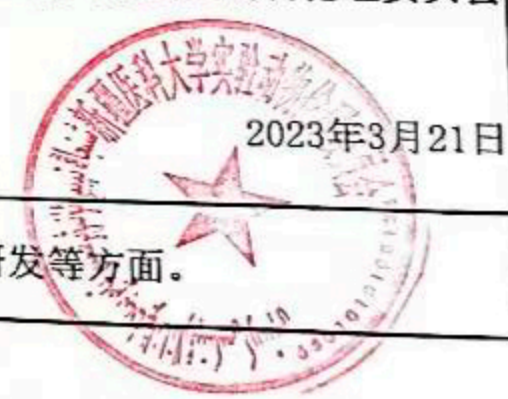

Supplement: Supplementary file 4 [file a29843c4812fd26066f7d6f5.pdf]
