# Supplementary material
Source: Research Square preprint supplement (doi:10.21203/rs.3.rs-8567933/v1)
Supplement: Supplementary file 2 [file 7934e554bb814fd9141be8c4.pdf]

## 涉及人的生物医学研究受试者知情同意书

## 知情同意书模板

## 知情同意书·知情告知页

亲爱的患者：

医生已经确诊您为 薄型子宫内膜/宫腔粘连/各种原因导致的子宫内膜基底层损伤。我们将邀请您参加一项新技术, 本新技术为 自体 i-PRF 宫腔灌注治疗薄型子宫内膜。

本研究方案已经得到 新疆医科大学一附院伦理委员会 审核, 同意进行临床研究。

在您决定是否参加这项研究之前, 请尽可能仔细阅读以下内容。它可以帮助您了解该项研究以及为何要进行这项研究, 研究的程序和期限, 参加研究后可能给您带来的益处、风险和不适。如果您愿意, 您也可以和您的亲属、朋友一起讨论, 或者请医生给予解释, 帮助您做出决定。

### 一、研究背景和研究目的

#### 1.1 疾病负担和治疗现状

子宫内膜接受能力是胚胎着床成功的关键, 子宫内膜厚度是子宫内膜容受性的一个指标, 也是胚胎移植后妊娠结局的预后标志物。然而, 尽管有了这些进展, 薄子宫内膜的管理和治疗仍然是一个挑战, 不孕患者这种情况, 子宫内膜薄的发病率为 2.4%。子宫内膜较薄 (定义为子宫内膜厚度为 <7mm) 不是胚胎植入的最佳选择, 它与不良妊娠结局、复发性妊娠丢失增加和胚胎移植失败增加有关。目前有许多治疗方法被用于提高植入的机会, 如延长雌激素治疗、低剂量阿司匹林、维生素 E、阴道西地那非、己酮可可碱、G-CSF 和干细胞治疗。然而, 尽管有了这些干预措施。

#### 1.2 本研究目的

自体 i-PRF 是一种新的替代方法治疗和管理薄型子宫内膜, 特别是对标准方法治疗困难的妇女。它为这些患者提供了一种低成本、容易获得的治疗选择。

#### 1.3 研究参加单位和纳入患者例数

新疆医科大学第一附属医院生殖中心患者。

### 二、检查 (研究) 内容

1. 在您入选研究前, 医生将询问、记录您的病史, 并进行 宫腔灌注和胚胎移植前 相关检查。

您是合格的纳入者, 您可自愿参加研究, 签署知情同意书。

如您不愿参加研究, 我们将按您的意愿施治。

2. 若您自愿参加研究, 将按以下步骤进行:

于月经干净前到医院完善相关检查, 无禁忌则根据病情需要每周期治疗 2-3 次, 每隔 2 天左右一次。

(1) “病人或正常人血液、尿液标本采集”: 在研究过程中我们需要采集一些您的标本, 将由专业人员为您取样, 例如从您的胳膊上抽取静脉血 10-40 毫升, 共需 2-3 次。您的样品仅用于自体治疗和相关指标的检测。

(2) “病人组织标本采集”：由于临床诊断或治疗需要，您要进行某些外科手术，手术中切除的组织除供临床常规病理检查之外可能还有一些剩余将丢弃，我们将收集这些剩余的组织标本进行研究。

### 3. 需要您配合的其他事项

您必须按医生和您约定的随访时间带着病例本来医院就诊（随访阶段，医生可能通过电话、登门的方式了解您的情况）。您的随访非常重要，因为医生将判断您接受的治疗是否真正起作用，并及时指导您。

您必须按医生指导用药，并请您及时、客观地填写您的服药记录。您在每次随访时都必须归还未用完的药物及其包装，并将正在服用的其它药物带来，包括您有其它合并疾病须继续服用的药物。

在研究期间您不能使用治疗医嘱外的其它药物。如您需要进行其它治疗，请事先与您的医生取得联系。

## 三、参加研究可能的受益

尽管已经有证据提示i-PRF有满意的疗效，但这并不能保证对您肯定有效。本研究所采用的自体 i-PRF 宫腔灌注治疗也不是治疗薄型子宫内膜/宫腔粘连/各种原因导致的子宫内膜基底层损伤的唯一的办法。如i-PRF对您的病情无效，您可以向医生询问有可能获得的替代治疗方法。

尽管参加本次研究可能不会给您带来直接的益处，但您的参与可能会给未来遭受同样痛苦的患者带来益处，为将后医学事业发展做出贡献。

## 四、参加研究可能的不良反应、风险和不适、不方便

告知参加研究可能的不良反应、风险和不适、不方便，并明确表明对其的处理方案和可能的补偿方案。

如果在研究期间您出现任何不适，或病情发生新的变化，或任何意外情况，不管是否与研究有关，均应及时通知您的医生，他/她将对此作出判断并给与适当的医疗处理。

您在研究期间需要按时到医院随访，做一些检查，这些占用您的一些时间，也可能给您造成麻烦或带来不方便。

## 五、本次研究之外的备选疗法

您可以不参与此项研究，可以选择接受针对您疾病的其他备选治疗方法，如延长雌激素治疗、低剂量阿司匹林、维生素 E、阴道西地那非、GCSF等方法，研究医生会向您介绍具体的获益和风险。

本研究为调查性研究，不涉及相关干预治疗，您可以选择不参加本项研究，这不会影响您的常规治疗。

## 六、有关费用

告知患者诊断和治疗过程中哪些费用可免，哪些需要患者自付

告知患者出现不良反应时，研究者是否负担处理不良反应的费用和患者可能获得的赔偿。如果您因参与这项研究而受到伤害，经医学专家委员会将会鉴定其是否与针刺或基础治疗有关。您可以获得免费治疗，研究者将按照中国的法律法规进行赔偿。

对于您同时合并的其他疾病所需的治疗和检查，将不在免费的范围之内。

## 七、个人信息的保密

如果您决定参加本项研究，您参加研究及在研究中的个人资料均属保密，您的血/尿标本或组织标本将以研究编号数字而非您的姓名加以标识。您的身份不会被识别，可以识别您身份的信息将不会透露给研究小组以外的成员，除非获得您的许可。所有的研究成员都被要求对您的身份保密，负责研究医师及其他研究人员将使用您的医疗信息进行研究。这些信息可能包括您的姓名、地址、电话号码、病史及在您研究来访时得到的信息。您的档案将保存在有锁的档案柜中，仅供研究人员查阅。为确保研究按照规定进行，必要时，政府管理部门或伦理委员会的成员按规定可以在研究单位查阅您的个人资料。这项研究结果发表论文时，将不会披露您个人的任何资料。

## 八、联系

您可以在任何时间提出有关本项研究的任何问题，希望与我们联系，电话：0991-4361348，如果在研究过程中有任何重要的新信息，可能影响您继续参加研究的意愿时，您的医生将会及时通知您。

## 九、可以自愿选择参加研究和中途退出研究

是否参加研究完全取决于您的意愿。您可以拒绝参加此项研究，或在研究过程中的任何时间退出本研究，这都不会影响您和医生间的关系，都不会影响对您的医疗或有其他方面利益的损失。

出于对您的最大利益考虑，医生或研究者可能会在研究过程中随时中止您继续参加本研究。

如果您因为任何原因从研究中退出，您可能被询问有关您使用试验药物的情况。如果医生认为需要，您可能被要求进行实验室检查和体格检查。

## 十、现在该做什么？

是否参加本项研究由您自己（和您的家人）决定。

在您做出参加研究的决定前，请尽可能向你的医生询问有关问题。

感谢您阅读以上材料。如果您决定参加本项研究，请告诉您的医生，他/她会为您安排一切有关研究的事务。请您保留这份资料。

## 知情同意书. 同意签字页

临床研究项目名称: 自体PCs 宫腔灌注治疗薄型子宫内膜课题承担单位: 新疆医科大学一附院课题协作单位: 无

## 同意声明

我已经阅读了上述有关本研究的介绍, 而且有机会就此项研究与医生讨论并提出问题。我提出的所有问题都得到了满意的答复。

我知道参加本研究可能产生的风险和受益。我知晓参加研究是自愿的, 我确认已有充足时间对此进行考虑, 而且明白:

- 我可以随时向医生咨询更多的信息。
- 我可以随时退出本研究, 而不会受到歧视或报复, 医疗待遇与权益不会受到影响。

我同样清楚, 如果我中途退出研究, 特别是由于药物的原因使我退出研究时, 我若将我的病情变化告诉医生, 完成相应的体格检查和理化检查, 这将对整个研究十分有利。

如果因病情变化我需要采取任何其他的药物治疗, 我会在事先征求医生的意见, 或在事后如实告诉医生。

我同意药品监督管理部门伦理委员会或申办者代表查阅我的研究资料。

我将获得一份经过签名并注明日期的知情同意书副本。

最后, 我决定同意参加本项研究, 并保证尽量遵从医嘱。

患者签名: \_\_\_\_\_ 年 \_\_\_\_ 月 \_\_\_\_ 日

联系电话: \_\_\_\_\_

患者法定监护人签名:: \_\_\_\_\_ 年 \_\_\_\_ 月 \_\_\_\_ 日

联系电话: \_\_\_\_\_

我确认已向患者解释了本试验的详细情况, 包括其权力以及可能的受益和风险, 并给其一份签署过的知情同意书副本。

医生签名: \_\_\_\_\_ 年 \_\_\_\_ 月 \_\_\_\_ 日

医生的工作电话: \_\_\_\_\_

翻译医生签名: \_\_\_\_\_ 年 \_\_\_\_ 月 \_\_\_\_ 日

联系电话: \_\_\_\_\_

(若受试者涉及少数民族人群, 此栏应加入)
